# Supplementary material for: Thioester-functionalised and oxime-based hexametallic manganese(iii) single-molecule magnets
Source: Royal Society of Chemistry journal article supplement (doi:10.1039/c7ra09841c), 2017-01-01
Supplement: c7ra09841c1.pdf [file c7ra09841c1.pdf]

## Electronic Supplementary Information (ESI)

### Thioester-functionalised and oxime-based hexametallic manganese(III) single-molecule magnets

Carlos Rojas-Dotti<sup>a</sup> and José Martínez-Lillo<sup>\*a</sup>

<sup>a</sup> Instituto de Ciencia Molecular (ICMol)/Departament de Química Inorgànica, Universitat de València, c/ Catedrático José Beltrán 2, 46980, Paterna, Valencia, Spain. [f.jose.martinez@uv.es](mailto:f.jose.martinez@uv.es)

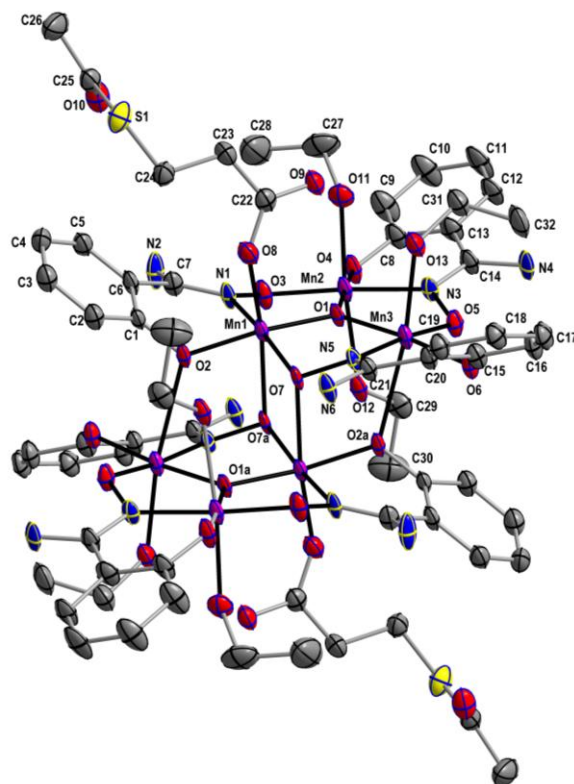

**Figure S1.** Perspective drawing of the  $[Mn_6]$  complex showing the atom numbering in **1**. Thermal ellipsoids are drawn at the 50% probability level. H atoms and solvent molecules of crystallisation have been omitted for clarity.

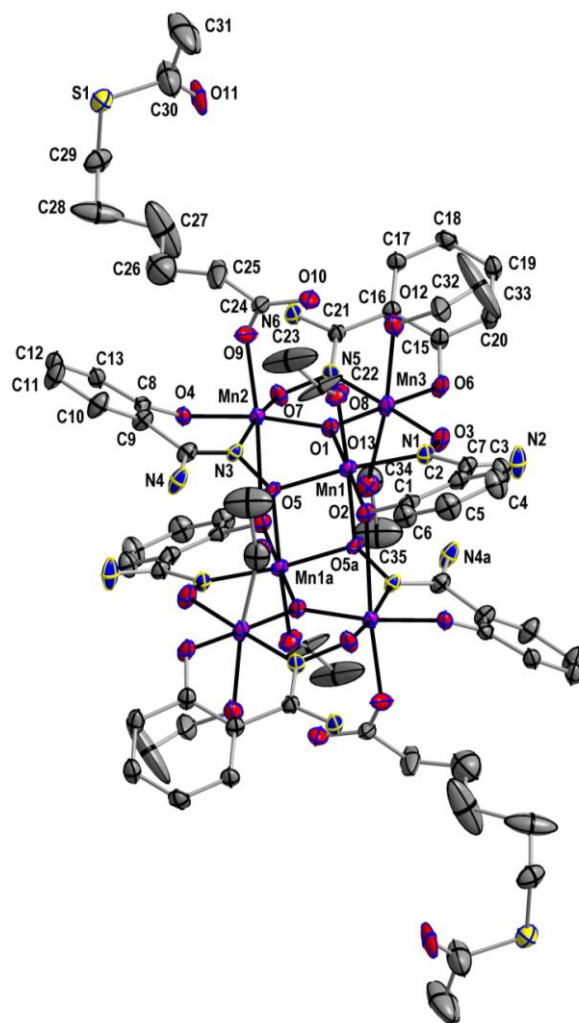

**Figure S2.** Perspective drawing of the [Mn<sub>6</sub>] complex showing the atom numbering in **2**. Thermal ellipsoids are drawn at the 50% probability level. H atoms and solvent molecules of crystallisation have been omitted for clarity.

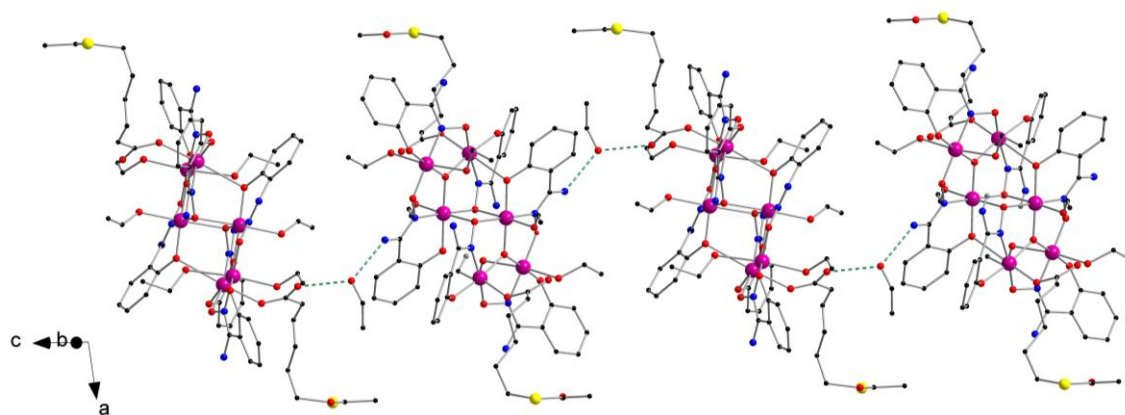

**Figure S3.** View of the one-dimensional motif generated by EtOH molecules sit between neighbouring [Mn<sub>6</sub>] complexes and simultaneously H-bonded to the amino and carboxylate groups of adjacent [Mn<sub>6</sub>] units in the crystal of **2** (dashed green lines) [Colour code: pink, Mn; yellow, S; red, O; blue, N; black, C].

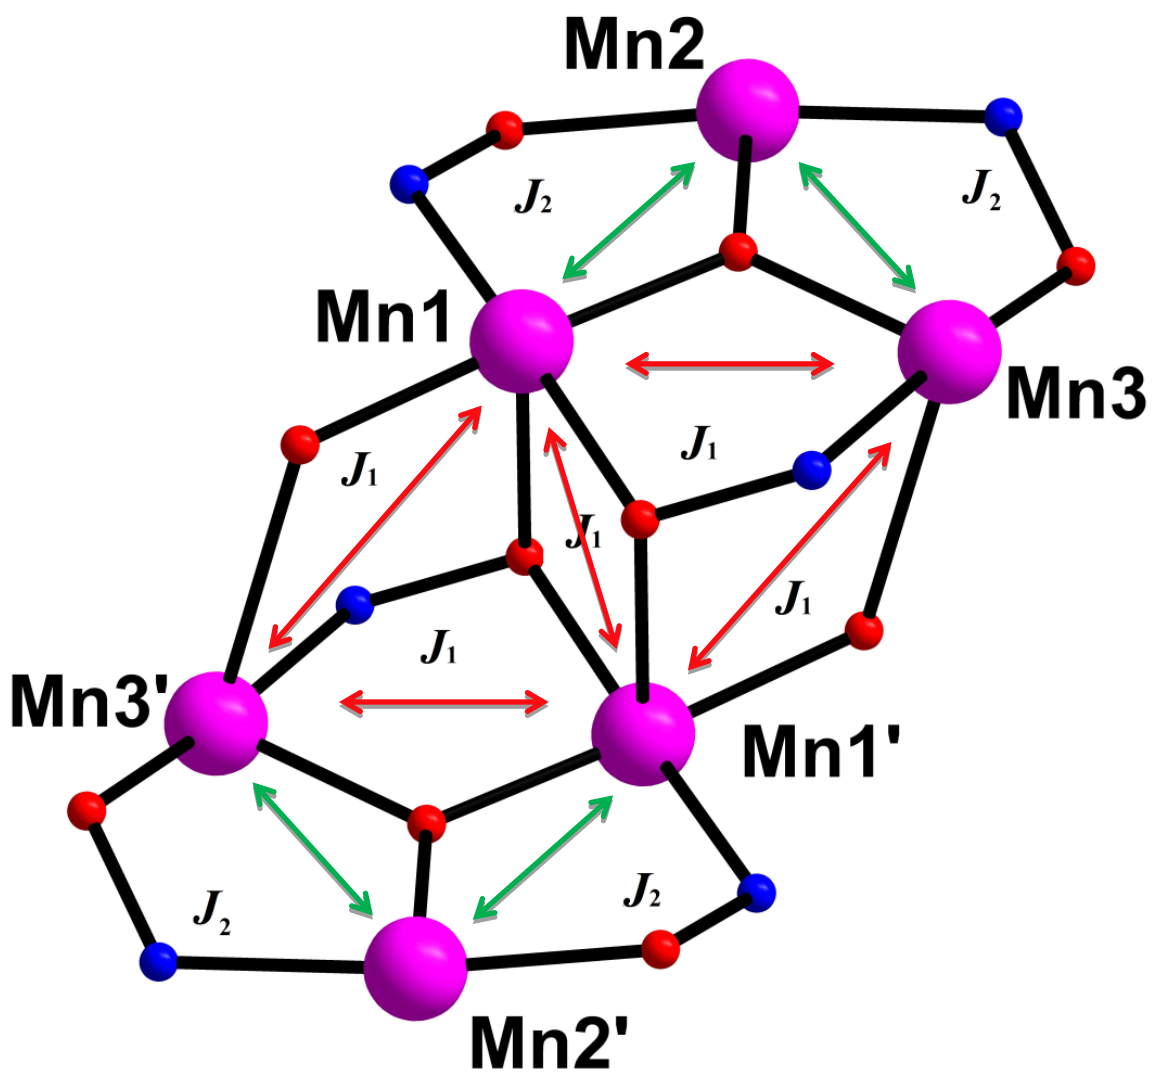

**Figure S4.** The  $2\text{-}J$  coupling exchange model used to fit the experimental magnetic data of **1** and **2**.
